# Supplementary material for: An amorphous CoSxmodified Mn0.5Cd0.5S solid solution with enhanced visible-light photocatalytic H2-production activity
Source: Royal Society of Chemistry journal article supplement (doi:10.1039/c8cy01253a), 2018-01-01
Supplement: c8cy01253a1.pdf [file c8cy01253a1.pdf]

## Supporting Information

### **Amorphous CoS<sub>x</sub> Modified Mn<sub>0.5</sub>Cd<sub>0.5</sub>S Solid Solution with Enhanced Visible-light Photocatalytic H<sub>2</sub>-Production Activity**

Mengdi Wang,<sup>a</sup> Qianwen Liu,<sup>a</sup> Nan Xu,<sup>a</sup> Ningxi Su,<sup>b</sup> Xuxu Wang,<sup>a</sup> Wenyue Su<sup>\*a</sup>

<sup>a</sup> State Key Laboratory of Photocatalysis on Energy and Environment, Fuzhou

University, Fuzhou 350116, P. R. China

<sup>b</sup> College of Zijin Mining, Fuzhou University, Fuzhou 350116, P. R. China

\*Corresponding author: Wenyue Su, Email: [suweny@fzu.edu.cn](mailto:suweny@fzu.edu.cn)

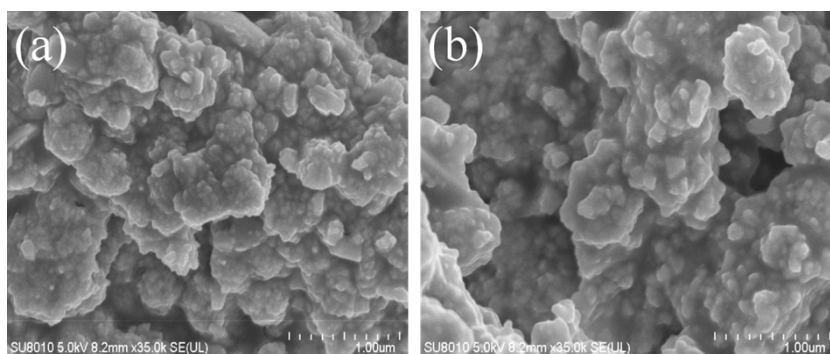

**Fig. S1** SEM image of (a)  $\text{Mn}_{0.5}\text{Cd}_{0.5}\text{S}$  (b) 0.3 wt%  $\text{CoS}_x/\text{Mn}_{0.5}\text{Cd}_{0.5}\text{S}$  sample.

**Table S1** The loading amount of Co in the wt%  $\text{CoS}_x/\text{Mn}_{0.5}\text{Cd}_{0.5}\text{S}$  samples.

| Samples                                                       | Co loading (wt%) |
|---------------------------------------------------------------|------------------|
| 0.1 wt% $\text{CoS}_x/\text{Mn}_{0.5}\text{Cd}_{0.5}\text{S}$ | 0.08             |
| 0.3 wt% $\text{CoS}_x/\text{Mn}_{0.5}\text{Cd}_{0.5}\text{S}$ | 0.24             |
| 0.9 wt% $\text{CoS}_x/\text{Mn}_{0.5}\text{Cd}_{0.5}\text{S}$ | 0.75             |
| 2.7 wt% $\text{CoS}_x/\text{Mn}_{0.5}\text{Cd}_{0.5}\text{S}$ | 1.66             |

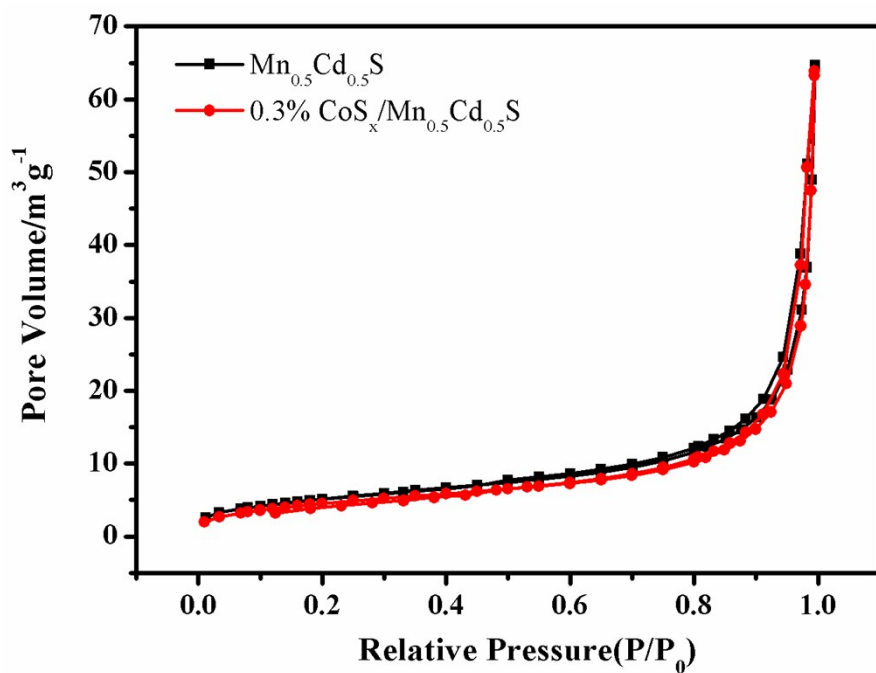

Fig. S2 N<sub>2</sub> adsorption-desorption isotherms of Mn<sub>0.5</sub>Cd<sub>0.5</sub>S and 3 wt% CoS<sub>x</sub>/Mn<sub>0.5</sub>Cd<sub>0.5</sub>S samples

Table S2 N<sub>2</sub> ad-desorption isotherms analysis of catalyst

| Sample                                                          | BET surface area (m <sup>2</sup> /g) | Pore diameter (nm) | Pore volume (m <sup>3</sup> /g) |
|-----------------------------------------------------------------|--------------------------------------|--------------------|---------------------------------|
| Mn <sub>0.5</sub> Cd <sub>0.5</sub> S                           | 18.5                                 | 23.00              | 0.0992                          |
| 0.3 wt% CoS <sub>x</sub> /Mn <sub>0.5</sub> Cd <sub>0.5</sub> S | 16.4                                 | 24.91              | 0.0974                          |

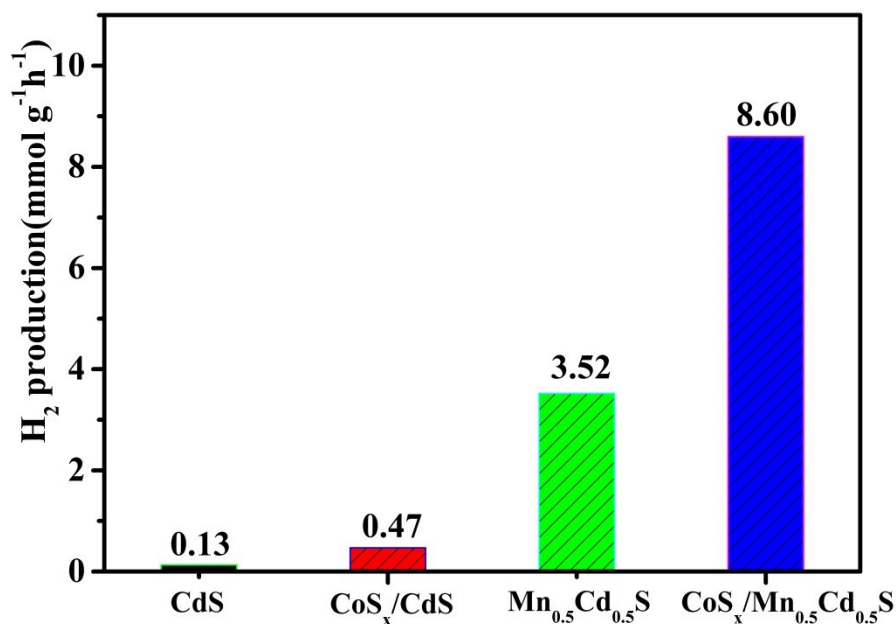

**Fig. S3** Photocatalytic activity rate of H<sub>2</sub> evolution over CdS, CoS<sub>x</sub>/CdS, Mn<sub>0.5</sub>Cd<sub>0.5</sub>S and CoS<sub>x</sub>/Mn<sub>0.5</sub>Cd<sub>0.5</sub>S samples

**Table S3** The data of time-resolved fluorescence

| Sample                                                  | $\tau_1$ (ns) |       | $\tau_2$ (ns) |       | $\tau_3$ (ns) |       | Ave.<br>$\tau$ (ns) |
|---------------------------------------------------------|---------------|-------|---------------|-------|---------------|-------|---------------------|
|                                                         | Value/n       | Rel%  | Value/n       | Rel%  | Value/n       | Rel%  |                     |
|                                                         | s             |       | s             |       | s             |       |                     |
| Mn <sub>0.5</sub> Cd <sub>0.5</sub> S                   | 0.83          | 28.16 | 3.435         | 54.18 | 17.02         | 17.66 | 5.10                |
| CoS <sub>x</sub> /Mn <sub>0.5</sub> Cd <sub>0.5</sub> S | 1.10          | 26.79 | 4.15          | 54.24 | 15.23         | 18.97 | 5.43                |

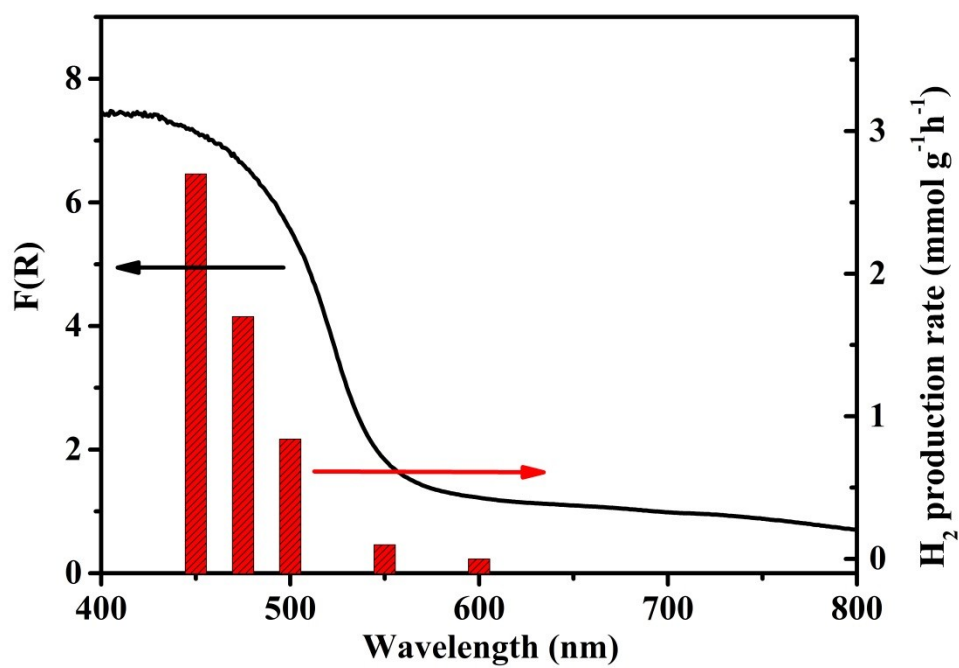

**Fig. S4** Wavelength-dependent photocatalytic H<sub>2</sub> evolution performance of CoS<sub>x</sub>/Mn<sub>0.5</sub>Cd<sub>0.5</sub>S

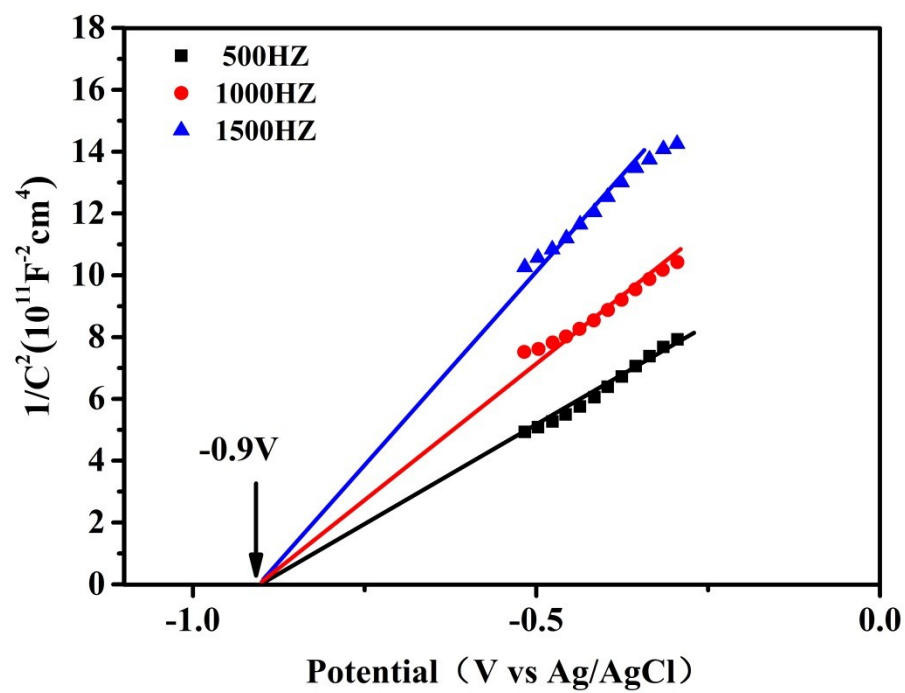

Fig. S5 Mott-Schottky plots of Mn<sub>0.5</sub>Cd<sub>0.5</sub>S
